# 1           **Screening of Thalassemia Carriers, Hemoglobin Variants, and** 2           **Comparison of Hematological Parameters between Children of** 3           **Bangladesh and Forcibly Displaced Myanmar Nationals**

4    Rumana Mahtarin<sup>1,3</sup>, Kasrina Azad<sup>1</sup>, Mohabbat Hossain<sup>1,9</sup>, Mst. Sharmin Aktar Mukta<sup>1</sup>,  
5    Mohammad Tanbir Habib<sup>1</sup>, Abu Bakar Siddik<sup>1</sup>, Nishat Sultana<sup>1</sup>, Zannat Kawser<sup>1</sup>, Umme Kulsum<sup>1</sup>,  
6    Nusrat Sultana<sup>1,3,5</sup>, Farjana Akther Noor<sup>6</sup>, Ahmad Zubair Mahdi<sup>7</sup>, Muhammad Asaduzzaman<sup>8</sup>,  
7    Md. Ahashan Habib<sup>8</sup>, Emran Kabir Chowdhury<sup>3</sup>, Firdausi Qadri<sup>1,2</sup>, Mst. Noorjahan Begum<sup>4</sup>,  
8    A.H.M. Nurun Nabi<sup>3\*</sup>

9  
10   <sup>1</sup>Institute for Developing Science and Health Initiatives (ideSHi), Dhaka-1206, Bangladesh

11   <sup>2</sup> Mucosal Immunology and Vaccinology, Infectious Diseases Division, International Centre for  
12    Diarrhoeal Disease Research, Bangladesh, Mohakhali, Dhaka, Bangladesh.

13   <sup>3</sup>Department of Biochemistry and Molecular Biology, University of Dhaka, Dhaka 1000,  
14    Bangladesh

15   <sup>4</sup>Virology Laboratory, Infectious Diseases Division, International Centre for Diarrhoeal Disease  
16    Research, Bangladesh, Mohakhali, Dhaka, Bangladesh.

17   <sup>5</sup>Department of Virology, Dhaka Medical College, Dhaka 1000, Bangladesh

18   <sup>6</sup>Department of Biochemistry and Molecular Biology, Tejgaon College, 16 Indira Road, Dhaka-  
19    1215, Bangladesh

20   <sup>7</sup>Department of Community Medicine & Public Health, Tairunnessa Memorial Medical College  
21    & Hospital, Gazipur, Bangladesh

22   <sup>8</sup>Upazila Health Complex, Matlab (North), Chandpur, Bangladesh

23   <sup>9</sup>Department of Genetic Engineering and Biotechnology, University of Chittagong, Chittagong-  
24    4331, Bangladesh

25  
26   \*Correspondence: [nabi@du.ac.bd](mailto:nabi@du.ac.bd)

## 41 **Abstract**

42 Thalassaemia is a hereditary blood disorder with different severity spectrums. This study aimed to  
43 assess thalassaemia screening rates between children of Bangladesh and selected camps of Forcibly  
44 Displaced Myanmar Nationals (FDMN) in Cox's Bazar in Bangladesh and compare the  
45 hematological parameters among the screening groups. Complete blood count (CBC) analysis and  
46 hemoglobin electrophoresis for each participant were performed by collecting venous blood.  
47 Statistical analysis was employed for the comparison of parameters in blood. The thalassaemia  
48 carrier and other hemoglobin variant rate in Bangladeshi children in selected areas have been found  
49 to be 20.7% and in FDMN children, the rate is 8.2%. Hematological differences are visualized  
50 among children of two nations. Intra-and interpopulation variances are highlighted in principal  
51 component analysis where higher variance (94.87%) in Bangladeshi children than FDMN children  
52 (80.68%). Receiver operating characteristics (ROC) and area under the curve (AUC) analyses  
53 revealed, RBC (0.761, 0.902, and 0.791) and RDW-CV are better model (0.819, 0.925, and 0.858)  
54 among the classifier of blood parameters. Pearson correlation shows distinguished covariation or  
55 association among the parameters. The outcome of the study highlights the discrepancies in levels  
56 of carriers in regions in Bangladesh and suggests further screening as well as population based  
57 molecular research to ensure better treatment strategies.

58

59 **Keywords:** Thalassaemia Carrier Screening, Beta Thalassaemia Trait, Hemoglobin Variant,  
60 Children

61

62

63

64

65

66

67

68

69

70

71

72

73

74

75

76

77

78

79

80

81

## 82 **1. Introduction**

83 Thalassaemia is an inherited hemolytic anemia which passes through autosomal recessive pattern  
84 [1]. A fractional or complete absence in the synthesis of  $\alpha$ -globin chains or  $\beta$ -globin chains due to  
85 genetic defects in the  *$\alpha$ -globin* gene cluster on chromosome 16 or the  *$\beta$ -globin* gene cluster on  
86 chromosome 11 can lead to the synthesis of defective hemoglobin [2]. In  $\beta$ -thalassaemia, the main  
87 consequence of unstable hemoglobin and iron overload is oxidative stress [4]. Iron triggers the  
88 manufacture of reactive oxygen species, which in excess are toxic, contributing to oxidative  
89 damage to red blood cells, leukocytes (recurrent infections), platelets (hypercoagulable state) [4],  
90 cellular dysfunction, apoptosis, and necrosis in vital organs such as heart, liver and endocrine  
91 system [1, 2]. People with  $\beta$ -thalassaemia major ( $\beta^0/\beta^0$ ,  $\beta^0/\beta^+$ , and sometimes  $\beta^+/\beta^+$ ) generally  
92 get medical attention within the first two years of life and necessitate regular RBC transfusions to  
93 survive [2]. This transfusion can cause iron overload [3]. Dysregulation of iron homeostasis  
94 promotes iron deposition in the organs and influences disease severity, which is the main cause of  
95 death in beta-thalassaemia patients [4, 5]. Each year worldwide more than 300,000 newborns are  
96 detected with major hemoglobinopathies of whom 60,000 to 70,000 are  $\beta$ -thalassaemia major cases,  
97 especially in the Mediterranean area, Middle East, Far East, and East Asia [3]. In Bangladesh, the  
98 birth rate of 33/10,000 had been reported where 8.68% had HbE trait, 2.24% had  $\beta$ -thalassaemia  
99 ( $\beta$ -thal) trait and nearly 2500 thalassaemia major cases are added every year in Bangladesh [6,7]  
100 while in Myanmar, thalassaemia carrier rate was 4.3% [8]. Previously migration increased the  
101 frequency of thalassaemia disease in lower-prevalence regions [10]. Over a million Rohingyas from  
102 Myanmar were forcefully displaced to Bangladesh and other neighboring countries by January  
103 2018. Over half of the displaced Rohingyas have sought shelter in Bangladesh and settled in  
104 Rohingya camps in Cox's Bazar [11]. There are no published thalassaemia screening outcomes on  
105 Forcefully Displaced Myanmar Nationals (FDMN) in Bangladesh. This study aimed to compare  
106 the prevalence of thalassaemia carriers and hemoglobin variants to associate hematological  
107 parameters among Bangladeshi children and Rohingya children who were forcibly displaced from  
108 Myanmar in Bangladesh.

## 109 **2. Methods**

### 110 **2.1. Enrollment of Study Participants**

111 In screening campaigns, a total of 92 Bangladeshi children (49% male and 51% female), aged  
112 between 1 and 15 years and 110 children of forcibly displaced Myanmar Nationals (58% male and  
113 42% female), aged between 7 and 16 years were enrolled in the study from 2 May 2022 to 22  
114 October 2022. The study (# PNR-22003) was ethically approved by Institutional Review Board of  
115 Institute for Developing Science and Health Initiatives (ideSHi). Participants were provided  
116 informed consent and written consent was taken from parents or legal guardians of each  
117 participant.

118

### 119 **Sample size calculation:**

120 Required sample size has been calculated by the following formula [12, 13]

$$121 \quad n = \frac{(Z_{\alpha} + Z_{\beta})^2 p(1 - p)}{e^2}$$

122 Where,

123  $n$  = required sample size,

124  $Z_{1-\alpha/2}$  = Standard normal variate for level of significance

125  $Z_{\beta}$  = Standard normal variate for power

126  $p$  = Expected prevalence,

127  $e$  = Margin of error or acceptable difference

128  $n_b$  = Sample size for Bangladeshi Population.

129  $n_m$  = Sample size for Myanmar Population.

130 Considering, the level of significance = 5%, power of the test = 85%, expected prevalence rate for  
131 Bangladeshi population  $P_b = 10.2\%$  [14], margin of error  $e = 10\%$  and including 15% attrition rate  
132 the sample size is  $n_b = 92$ . Again, with the level of significance = 5%, power of the test = 96%,  
133 expected prevalence rate for Myanmar population  $P_m = 4.3\%$  [8], margin of error  $e = 9\%$  and  
134 including 15% attrition rate the sample size is  $n_m = 110$ .

## 135 **2.2. Analysis of Complete Blood Count of The Study Participants**

136 Three ml of venous blood was collected from each participant in EDTA containing vacutainer and  
137 the collected blood samples were transported to the laboratory maintaining 4-8°C and preserved at

138 4°C until analysis. The complete blood count (CBC) was performed for each sample by using XS-  
139 800i Hematology Analyzer (Sysmex, Japan) following the manufacturers' instruction. Major  
140 hematological parameters like hemoglobin (HGB), hematocrit (HCT), RBC count and Red Cell  
141 Indices including mean corpuscular volume (MCV), mean corpuscular hemoglobin (MCH), mean  
142 corpuscular hemoglobin concentration (MCHC) and Red cell distribution width (RDW) were  
143 considered for analysis.

### 144 **2.3. Hemoglobin Electrophoresis**

145 Hemoglobin electrophoresis was performed on automated capillary electrophoresis system (Sebia,  
146 France) using Capillary Hemoglobin (E) kit to measure HbA, HbA2, HbF, and other abnormal Hb  
147 variants following manufacturer's instructions.

### 148 **2.4 Statistical Analysis**

149 Statistical analysis was performed using SPSS and GraphPad Prism software (version 9.0) and R  
150 programming.  $P < 0.05$  was considered statistically significant for all the tests. One-way ANOVA  
151 was performed for the analysis of hematological differences, and the distribution pattern was  
152 visualized. Principle component analysis was performed for understanding intra and inter  
153 population variation. Covariation of association among the major hematological parameters was  
154 visualized by Pearson correlation. Receiver operating characteristics (ROC) and area under the  
155 curve (AUC) analyses were also conducted for diagnostic assessment.

156

157

## 158 **3. Results**

### 159 **3.1. Thalassemia Carrier and Hemoglobin Variant Screening** 160 **Outcomes**

161 In the study, the screening showed that the frequency of thalassemia traits and other hemoglobin  
162 variants in Bangladeshi children was 20.7%, where beta thalassemia trait (BTT) and HbE trait  
163 (HbET) were 5.43% and 13.04%, respectively. The highest carrier frequency was found among  
164 the children in Dhaka and Rangpur (only HbE, 23.5%) divisions, while it is comparatively lower  
165 in Chattogram (17.65%, BTT-11.76%, HbET-5.89%), and Barishal (17.65%, BTT-11.76%,  
166 HbET- 5.89%). The lowest carrier frequency was observed among the children in Sylhet (only

167 HbET-5.8%), Mymensingh (only HbET-5.8%) and Khulna (only BTT-5.8%) divisions. The low  
168 HbA2 had been detected in Rajshahi (1.1%).

169 On the other hand, thalassemia carrier and other hemoglobin variant frequency was 8.2% among  
170 the children from the FDMNs, where BTT and HbE were 2.73% and 5.45%, respectively. In  
171 addition, HbD variant was also found in the Bangladeshi children (1.09%) and FDMN children  
172 (0.9%). The distribution of different groups in screening was displayed in Fig 1.

173  
174 **Fig 1.** The alluvial plot represents distribution of screening outcomes in BD and FDMN children. The color codes  
175 indicate different groups: Beta Thalassemia Trait (purple), HbD Trait (blue), HbE Trait (lemon), Low Hb A2 (orange).  
176

### 177 **3.2. Analysis of Hemoglobin Variants**

178 Hemoglobin electrophoresis among the healthy participants of Bangladeshi children showed the  
179 levels of HbA and HbA2 were  $97.14 \pm 0.31\%$  and  $2.80 \pm 0.25\%$ , respectively. In beta thalassemia  
180 trait (BTT), the levels of HbA, HbA2 and HbF were  $93.78 \pm 1.5\%$ ,  $5.40 \pm 0.36\%$ , and  $2.05 \pm 2.33\%$   
181 respectively. In HbE trait the levels of HbA, HbA2 and HbE were  $70.80 \pm 1.4\%$ ,  $3.72 \pm 0.48\%$ ,  
182 and  $25.39 \pm 1.08\%$ , respectively. In addition, HbA (54%), HbA2 (3.7%), and HbD (42.3%) were  
183 found in HbD trait. In low HbA2 participant, HbA was 98.1% and HbA2 was 1.9%, and suspected  
184 to have alpha thalassemia trait (HGB 8.7 g/dL, RBC  $4.68 \times 10^{12}/L$ , MCV 55.8 fL, MCH 18.6  
185 pg) according to Mentzer index ( $MCV/RBC < 13$ ).

186 On the other hand, among the normal or non-carrier children of FDMN, the levels of HbA and  
187 HbA2 were  $97.3 \pm 0.29\%$  and  $2.67 \pm 0.21\%$  respectively. In beta thalassemia trait (BTT), the level  
188 of HbA was  $93.6 \pm 0.47\%$ , HbA2 was  $5.3 \pm 0.47\%$  and HbF was  $1.17 \pm 0.5\%$ . In HbE trait, the  
189 level of HbA was  $72.9 \pm 3.12\%$ , HbA2 was  $3.8 \pm 0.35\%$ , HbE was  $23.0 \pm 3.4\%$ , and HbF was  
190 1.1%. In addition, a child of FDMN with HbD trait showed the level of HbA, HbA2, and HbD at  
191 56.4%, 2.9%, and 41%, respectively. Alpha thalassemia trait was not found in FDMN children  
192 from study population.

193

### 194 **3.3. Principal Component Analysis**

195 In this study, the principal component analysis was considered as feature extractor to compare the  
196 participants of Bangladesh (BD) and Forcibly Displaced Children of Myanmar Nationals. The

197 principal components, PC1 and PC2 accounted for most of the variation in the participants based  
198 on gender and age distribution. In Fig 2A among Bangladeshi children, PC1 and PC2 showed  
199 63.0% and 31.7% variance, respectively (in total 94.87%). On the contrary, the FDMN children  
200 showed the variance of PC1 and PC2 at 50% and 30.7%, respectively, while the total variance was  
201 80.68% (Fig 2B).

202 **Fig 2.** Intra-and inter-population variances are highlighted in Principal component analysis. (A) PC scores in BD  
203 children's groups and (B) PC scores in FDMN children's groups. The color codes represent different groups in BD  
204 and FDMN children, Normal (blue), Beta Thalassemia Trait (BTT) (red), HbE (green), HbD (purple), Low HbA2  
205 (orange).

### 206 **3.4. Analysis of Hematological Differences between Bangladeshi and** 207 **Forcibly Displaced Children of Myanmar Nationals**

208 The column bar graphs exhibited a diverse distribution of major hematological parameters among  
209 the prevalent groups in children of the two countries.

210  
211 **Fig 3.** Distribution pattern of major hematological parameters.

212 Normal, Beta Thalassemia Trait (BTT), and Hemoglobin E Trait (HbET) groups in both (A) BD and (B) FDMN  
213 children.

214  
215 According to the one-way ANOVA test, RBC, MCV, MCH, and RDW-CV were substantially  
216 different among the normal, BTT, and HbET groups in Bangladeshi children (Fig 3A), with a p-  
217 value of 0.05. Among the BTT children of Bangladesh, RBC and RDW-CV were found  
218 significantly higher, whereas MCV and MCH were significantly lower compared to the normal  
219 value (Table 1). In the FDMN children, all the hematological parameters except MCHC showed  
220 significant results among the normal, BTT and HbET groups (Fig 3B) with a p-value of <0.05.  
221 RBC and RDW-CV were significantly higher, while HGB, HCT, MCV, and MCH were  
222 significantly lower compared to the normal level in BTT in the FDMN children (Table 2).

223 However, the hematological parameters of both Bangladeshi children and FDMN children showed  
224 significant results for RBC, HGB, MCV, MCH, HCT, and RDW-CV among the normal, BTT and  
225 HbET groups. RBC and RDW-CV were significantly higher, while HGB, HCT, and MCH were  
226 significantly lower in BTT of both populations (Table 3).

227 **Table 1. Comparative analysis of major hematological parameters of Bangladeshi children**  
228 **in major groups**

229

| Hematological parameters   | Normal       | BTT          | HbET         | P value |
|----------------------------|--------------|--------------|--------------|---------|
| RBC (X10 <sup>12</sup> /L) | 4.34 ± 0.47  | 5.83 ± 1.14  | 4.76 ± 0.50  | 0.000   |
| HGB (g/dL)                 | 11.53 ± 1.25 | 10.87 ± 1.68 | 10.79 ± 1.21 | 0.107   |
| HCT (%)                    | 31.59 ± 3.27 | 30.50 ± 4.55 | 29.56 ± 2.59 | 0.096   |
| MCV (fL)                   | 72.97 ± 4.98 | 52.73 ± 3.54 | 62.61 ± 6.06 | 0.000   |
| MCH (pg)                   | 26.62 ± 1.89 | 18.77 ± 1.17 | 22.68 ± 2.46 | 0.000   |
| MCHC (g/dL)                | 36.49 ± 1.01 | 35.60 ± 0.26 | 36.19 ± 1.21 | 0.232   |
| RDW-CV (%)                 | 13.52 ± 1.01 | 17.73 ± 1.94 | 15.19 ± 2.24 | 0.000   |

230 *Here, RBC means Red Blood Corpuscle, HGB means Hemoglobin, HCT means Hematocrit, MCV means Mean*  
 231 *Corpuscular Volume, MCH means Mean Corpuscular Hemoglobin, MCHC means Mean Corpuscular*  
 232 *Hemoglobin Concentration, and RDW-CV means Red Cell Distribution Width - Coefficient of Variation*  
 233

234 **Table 2. Comparative analysis of major hematological parameters of Forcibly Displaced**  
 235 **Children of Myanmar Nationals (FDMN) children in major groups**

| Hematological parameters   | Normal       | BTT          | HbET         | P value |
|----------------------------|--------------|--------------|--------------|---------|
| RBC (X10 <sup>12</sup> /L) | 4.46 ± 0.33  | 5.45 ± 0.17  | 4.89 ± 0.26  | 0.000   |
| HGB (g/dL)                 | 11.41 ± 0.90 | 9.43 ± 0.65  | 10.90 ± 0.67 | 0.001   |
| MCV (fL)                   | 73.92 ± 4.03 | 51.03 ± 0.81 | 63.76 ± 3.85 | 0.000   |
| HCT (%)                    | 32.92 ± 2.39 | 27.83 ± 1.03 | 31.12 ± 1.70 | 0.001   |
| MCH (pg)                   | 25.62 ± 1.71 | 17.30 ± 0.66 | 22.34 ± 1.45 | 0.000   |
| MCHC (g/dL)                | 34.64 ± 0.99 | 33.90 ± 1.15 | 35.02 ± 0.66 | 0.299   |
| RDW-CV (%)                 | 13.40 ± 0.80 | 19.50 ± 0.95 | 14.32 ± 0.30 | 0.000   |

236 *Here, RBC means Red Blood Corpuscle, HGB means Hemoglobin, HCT means Hematocrit, MCV means Mean*  
 237 *Corpuscular Volume, MCH means Mean Corpuscular Hemoglobin, MCHC means Mean Corpuscular*  
 238 *Hemoglobin Concentration, and RDW-CV means Red Cell Distribution Width - Coefficient of Variation*  
 239

240 **Table 3. Comparative analysis of major hematological parameters of both Bangladeshi and**  
 241 **Forcibly Displaced Children of Myanmar Nationals (FDMN) children in major groups**

| Hematological parameters   | Normal       | BTT          | HbET         | P value |
|----------------------------|--------------|--------------|--------------|---------|
| RBC (X10 <sup>12</sup> /L) | 4.41 ± 0.40  | 5.62 ± 0.64  | 4.71 ± 0.37  | 0.000   |
| HGB (g/dL)                 | 11.46 ± 1.06 | 10.09 ± 1.18 | 10.93 ± 1.09 | 0.000   |
| MCV (fL)                   | 72.98 ± 5.36 | 58.51 ± 9.04 | 66.58 ± 5.44 | 0.000   |
| HCT (%)                    | 32.36 ± 2.90 | 29.80 ± 3.04 | 30.79 ± 2.85 | 0.013   |
| MCH (pg)                   | 26.04 ± 1.85 | 17.96 ± 1.01 | 23.16 ± 1.47 | 0.000   |
| MCHC (g/dL)                | 35.42 ± 1.35 | 34.96 ± 1.10 | 35.91 ± 1.26 | 0.206   |
| RDW-CV (%)                 | 13.45 ± 0.89 | 18.03 ± 1.80 | 14.81 ± 2.01 | 0.000   |

242 *Here, RBC means Red Blood Corpuscle, HGB means Hemoglobin, HCT means Hematocrit, MCV means Mean*  
 243 *Corpuscular Volume, MCH means Mean Corpuscular Hemoglobin, MCHC means Mean Corpuscular*  
 244 *Hemoglobin Concentration, and RDW-CV means Red Cell Distribution Width - Coefficient of Variation*  
 245



### 246 **3.5. Correlation among Hematological Parameters in Different** 247 **Groups of Children in Bangladesh and Forcibly Displaced Myanmar** 248 **Nationals (FDMN)**

249 Pearson correlation showed covariation or association among the hematological parameters.  
250 Diverse correlation pattern in CBC parameters was persistent in both BD and FDMN children.  
251 Among Bangladeshi children, normal or non-carriers and HbET showed quite similar type of  
252 strong positive correlation pattern among RBC, HGB, HCT, MCV and MCH, while RDW-CV  
253 exhibited negative correlation with the other hematological parameters. BTT showed strong  
254 positive relationship among RBC, HGB, HCT, and RDW-CV, MCV, and MCH. In FDMN,  
255 variations were more prominent among the different groups. BTT exhibited strong positive  
256 correlation among most of the hematological parameters except HCT and RDW-CV (Fig 4).  
257

258 **Fig 4.** Correlation pattern in major hematological parameters in both BD and FDMN children in major groups.  
259 The groups in (A) BD children and (B) FDMN children. BTT indicates Beta Thalassemia Trait and HbET indicates  
260 Hemoglobin E Trait. The major hematological parameters are numbered as 1 to 7 and the correlation is measured as -  
261 1.0 to 1.0. Color code indicates correlation pattern. Red color indicates negative correlation (-1.0 to 0) where -1.0  
262 indicates least correlation and blue color indicates positive correlation (0 to 1.0) where 1.0 indicates highest correlation.  
263

### 264 **3.6. ROC Curve Analysis**

265 ROC curve analysis was performed for the assessment of diagnostic value of thalassemia carrier  
266 and hemoglobin variant screening. ROC curves were plotted for children of Bangladesh and  
267 FDMN children (Fig 5A, Fig 5B) and for both nations (Fig 5C). AUC was measured to visualize  
268 the classifier of blood parameter model. RBC (0.761, 0.902, and 0.791) and RDW-CV (0.819,  
269 0.925, and 0.858) covered high AUC and good classifier for carrier screening. High AUC indicated  
270 more accuracy for diagnostic performance which might be supportive to hemoglobin  
271 electrophoresis test for proper diagnosis of thalassemia and hemoglobinopathies.  
272

273 **Fig 5.** ROC curve and area under curve display classifier of blood parameter model. (A) BD (B) FDMN (C) both  
274 BD and FDMN.  
275

276  
277  
278

## 279 **4. Discussion**

280 This is the first study for assessment of thalassemia carrier and hemoglobin variant screening data  
281 in children between Bangladesh and Forcibly Displaced Myanmar Nationals (FDMN). In the  
282 study, the frequency of thalassemia carriers and hemoglobin variants in Bangladeshi children is  
283 found 20.7%, which is double of the previous report (10.2%) [7, 14]. The highest carrier frequency  
284 was found in Dhaka and Rangpur divisions while the lowest carrier frequency was observed in  
285 Sylhet, Mymensingh, and Khulna divisions. On the other hand, the carrier rate in FDMN children  
286 was 8.2%, where beta thalassemia trait (BTT) rate is 2.73%, and HbE trait (HbET) rate is 5.45%.  
287 Combining the rate for both study groups, the cumulative carrier rate is around 14% which is also  
288 demonstrate the increasing trend compared to previous record [7, 14]. Principle component  
289 analysis highlights the marked variations in Bangladesh and Forcibly Displaced Myanmar  
290 Nationals for their genetic ancestry conformation. Higher variance has been exposed in  
291 Bangladeshi children (94.9%) than in FDMN children (80.7%) for intra-and inter-population  
292 variances of different groups. Divergent distribution pattern of major hematological parameters  
293 was visualized for the children of both Bangladesh and FDMN. The variations were higher in BTT  
294 group of both populations while wider distribution in Bangladesh and narrower distribution  
295 patterns are visible in FDMN children. ROC curve evaluates the diagnostic performance of carrier  
296 and hemoglobin variant screening by demonstrating the sensitivity and specificity of the test. AUC  
297 under ROC curve was measured to visualize the classifier of blood parameter model. RBC (0.761,  
298 0.902, and 0.791) and RDW-CV (0.819, 0.925, and 0.858) display high AUC which indicates  
299 better classifier for the screening. Comparing all the parameters, RBC and RDW-CV are  
300 supportive to hemoglobin electrophoresis to evaluate the screening outcomes. There was  
301 association of RDW-CV and thalassemia disease severity in previous study [9]. Correlation  
302 matrixes represent covariation or association among the parameters. Distinguished correlation  
303 was revealed in both Bangladesh and FDMN children. BTT groups of both Bangladesh and FDMN  
304 demonstrate the higher number of strong positive correlation among parameters although the  
305 parameters differ in their association. Mostly RDW-CV demonstrates quite negative association  
306 with other hematological parameters in the FDMN children. All the analyses demonstrate the  
307 similarities and discrepancies in the major hematological parameters of the groups from  
308 Bangladesh and Forcibly Displaced Myanmar Nationals. The screening in children has been

309 conducted to determine the carrier and hemoglobin variant rates of existing populations with two  
310 different genetic background in Bangladesh. However, a drawback is that we could screen only a  
311 limited number of children since this was conducted within a thalassemia awareness program.  
312 More extensive thalassemia carrier screening and awareness programs, prenatal diagnosis, and  
313 compulsory carrier screening before marriage should be implemented to prevent the spread of  
314 thalassemia disease and other hemoglobinopathies. This comparative study will be helpful for  
315 track the rates of thalassemia carrier and hemoglobin variant in children to prevent the disease  
316 burden. As well as this population-based study will expedite molecular analysis for the  
317 improvement of thalassemia treatment strategies by initiating personalized medicine. Finally, such  
318 studies and programs will help in creating awareness of thalassemia, its prevention and in policy  
319 changes in the country.

## 320 **5. Conclusion**

321 The frequency of carrier and hemoglobin variant is much higher in Bangladeshi children than the  
322 displaced population from Myanmar (FDMN) into Bangladesh. This comparative study highlights  
323 the discrepancies in thalassemia carrier and hemoglobin variant status on children which will be  
324 helpful to understand the burden of thalassemia and hemoglobinopathies. Increasing the number  
325 of screening and being aware of devastating health consequences are vital for prevention of  
326 disease.

327

## 328 **Acknowledgement**

329 The authors are grateful to the First Security Islami Bank, Bangladesh for their contribution and  
330 support to conduct the thalassemia screening program. We are thankful to the study participants,  
331 the clinicians and staff for their assistance in specimen collection, and the thalassemia screening  
332 team members of ideSHi.

333

## 334 **References**

- 335 [1] Fibach, E. and E.A. Rachmilewitz, *Pathophysiology and treatment of patients with beta-*  
336 *thalassemia - an update*. F1000Res, 2017. **6**: p. 2156.  
337 [2] Taher, A.T. and A.N. Saliba, *Iron overload in thalassemia: different organs at different*  
338 *rates*. Hematology Am Soc Hematol Educ Program, 2017. **2017**(1): p. 265-271.

- 339 [3] Taher, A., et al., in *Guidelines for the Management of Non Transfusion Dependent*  
340 *Thalassaemia (NTDT)*, D. Weatherall, Editor. 2013, Thalassaemia International Federation  
341 © 2013 Thalassaemia International Federation.: Nicosia (Cyprus).
- 342 [4] Sposi, N., *Oxidative Stress and Iron Overload in  $\beta$ -Thalassaemia: An Overview*. 2019.
- 343 [5] Leecharoenkiat, K., et al., *Iron dysregulation in beta-thalassaemia*. Asian Pac J Trop Med,  
344 2016. **9**(11): p. 1035-1043.
- 345 [6] Hossain, M.S., et al., *Thalassemys in South Asia: clinical lessons learnt from Bangladesh*.  
346 Orphanet Journal of Rare Diseases, 2017. **12**(1): p. 93.
- 347 [7] Noor, F.A., et al., *Nationwide carrier detection and molecular characterization of  $\beta$ -*  
348 *thalassaemia and hemoglobin E variants in Bangladeshi population*. Orphanet J Rare Dis,  
349 2020. **15**(1): p. 15.
- 350 [8] Win, S., *Epidemiology and current status of case management of thalassaemia in Myanmar*  
351 *- Country Report*. Burma medical journal, 2016. **58**: p. 43-51.
- 352 [9] Islam, M.T., et al., Association of diverse population of red blood cells with different  
353 disease manifestations in patients with beta-thalassaemia. Meta Gene, 2021. **27**: p. 100846.
- 354 [10] Kattamis, A., et al., *Changing patterns in the epidemiology of  $\beta$ -thalassaemia*. Eur J  
355 Haematol, 2020. **105**(6): p. 692-703.
- 356 [11] Rashid, R., et al., *A descriptive study of Forcefully Displaced Myanmar Nationals (FDMN)*  
357 *presenting for care at public health sector hospitals in Bangladesh*. Glob Health Action,  
358 2021. **14**(1): p. 1968124.
- 359 [12] Pourhoseingholi, M.A., M. Vahedi, and M. Rahimzadeh, *Sample size calculation in*  
360 *medical studies*. Gastroenterol Hepatol Bed Bench, 2013. **6**(1): p. 14-7.
- 361 [13] Charan, J. and T. Biswas, *How to calculate sample size for different study designs in*  
362 *medical research?* Indian J Psychol Med, 2013. **35**(2): p. 121-6.
- 363 [14] Khan, W.A., et al. *Prevalence of Beta thalassaemia trait and Hb E trait in Bangladeshi*  
364 *school children and health burden of thalassaemia in our population*. 2005.
- 365
- 366

medRxiv preprint doi: <https://doi.org/10.1101/2023.09.19.23295805>; this version posted September 21, 2023. The copyright holder for this preprint (which was not certified by peer review) is the author/funder, who has granted medRxiv a license to display the preprint in perpetuity. It is made available under a [CC-BY 4.0 International license](https://creativecommons.org/licenses/by/4.0/).

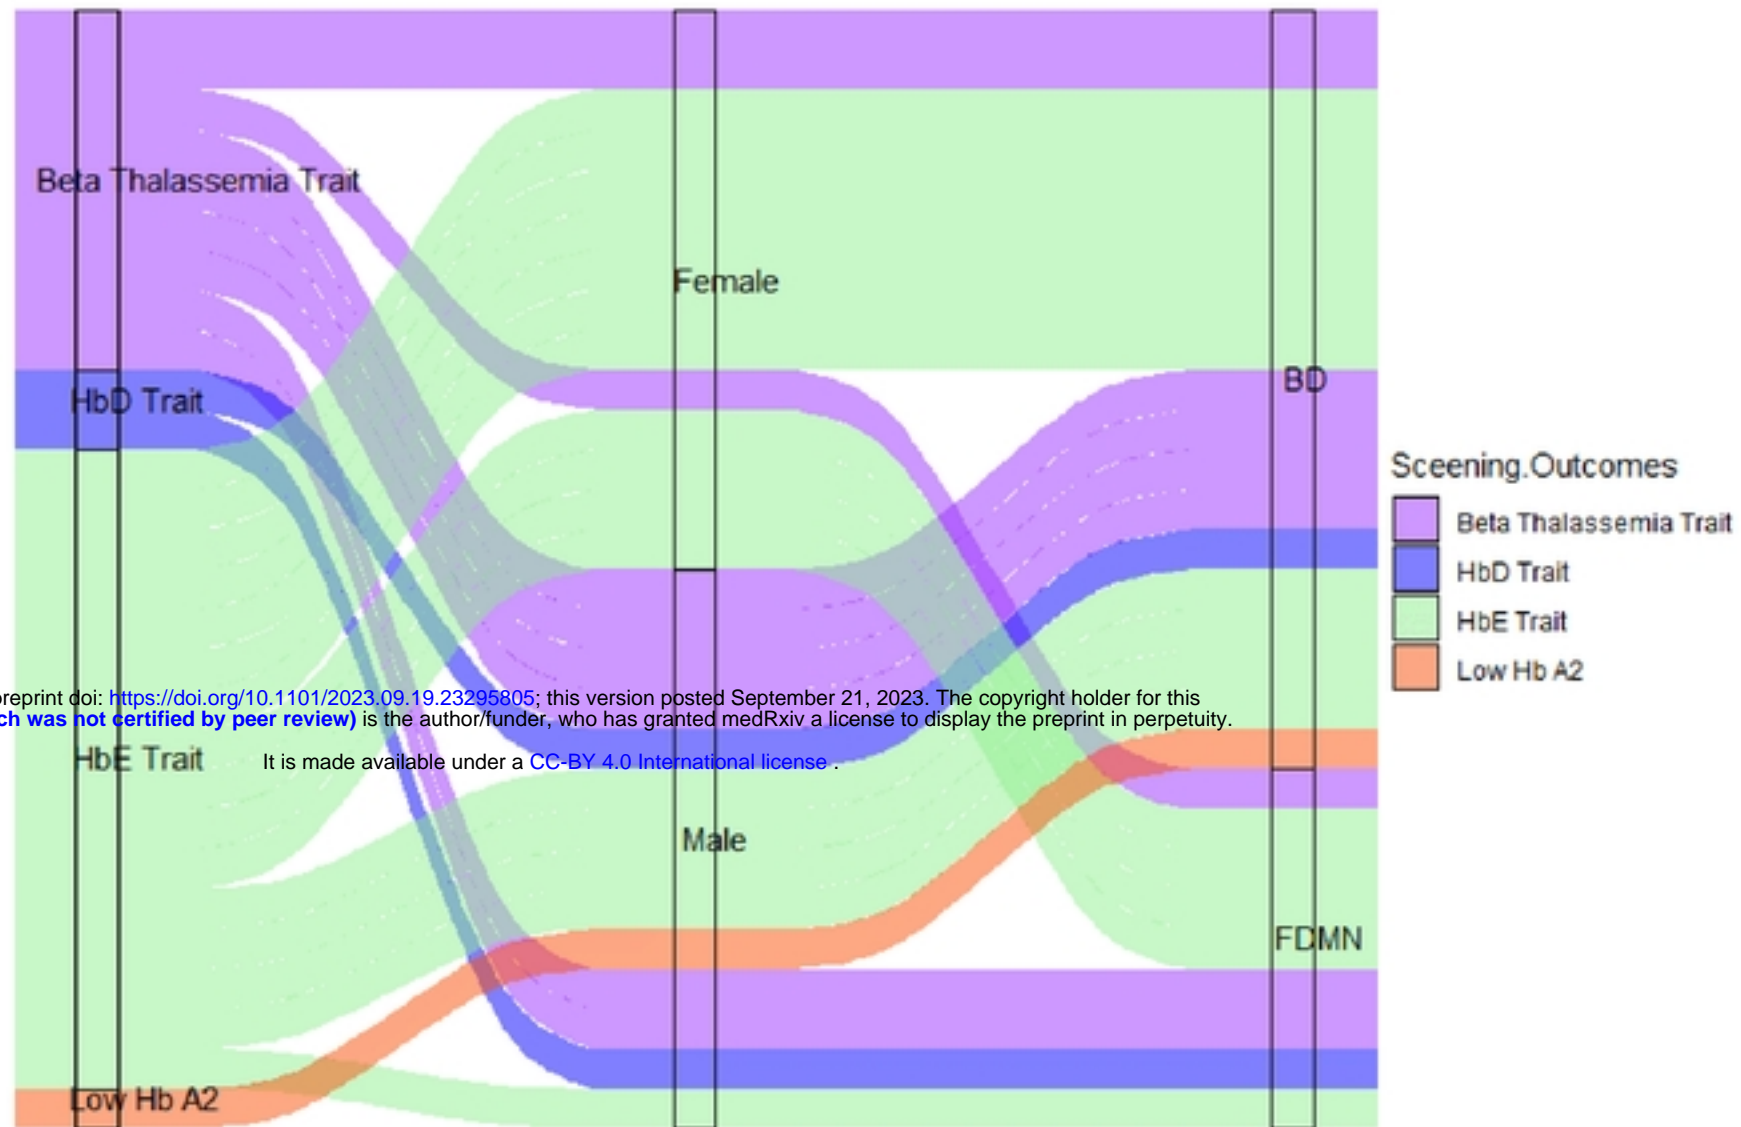

**Fig 1.** The alluvial plot represents distribution of screening outcomes in BD and FDMN children. The color codes indicate different groups: Beta Thalassemia Trait (purple), HbD Trait (blue), HbE Trait (lemon), Low Hb A2 (orange).

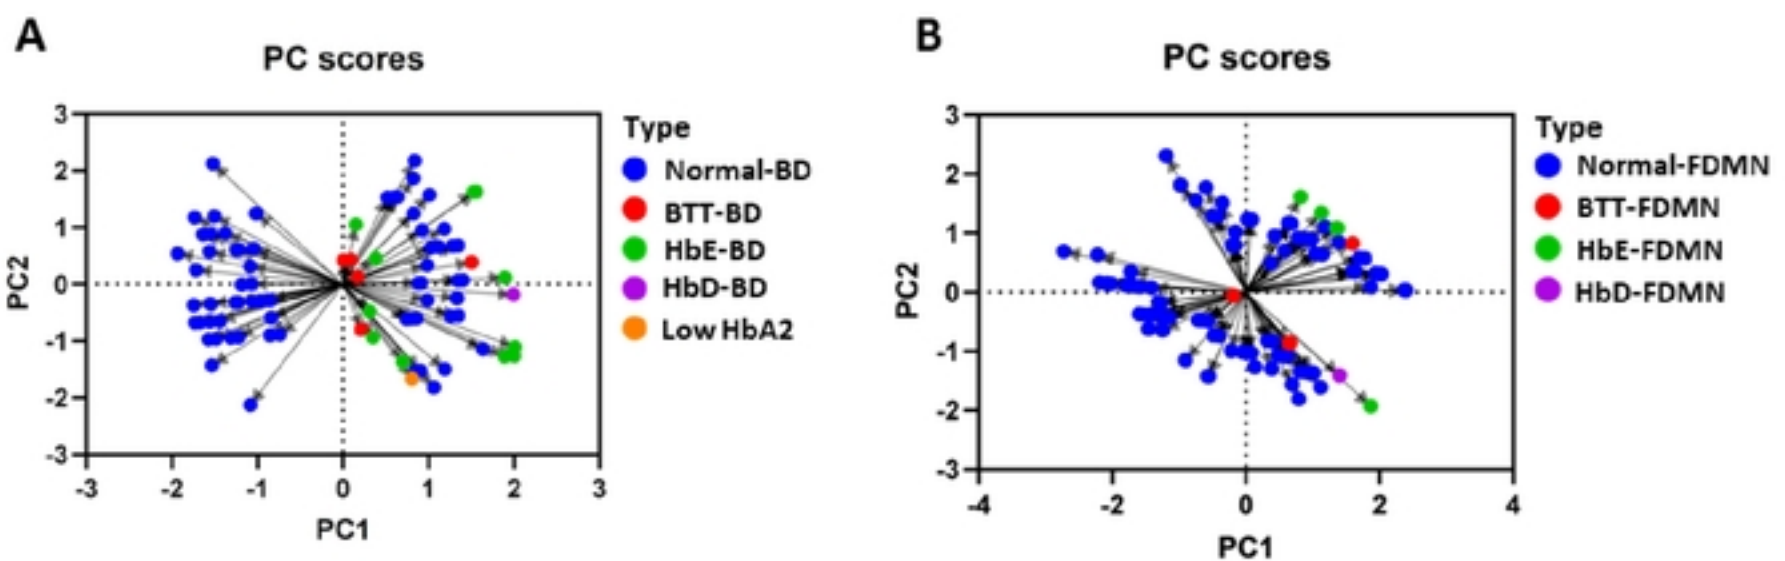

**Fig 2.** Intra- and inter-population variances are highlighted in Principal component analysis. (A) PC scores in BD children's groups and (B) PC scores in FDMN children's groups. The color codes represent different groups in BD and FDMN children, Normal (blue), Beta Thalassemia Trait (BTT) (red), HbE (green), HbD (purple), Low HbA2 (orange).

medRxiv preprint doi: <https://doi.org/10.1101/2023.09.19.23295805>; this version posted September 21, 2023. The copyright holder for this preprint (which was not certified by peer review) is the author/funder, who has granted medRxiv a license to display the preprint in perpetuity.

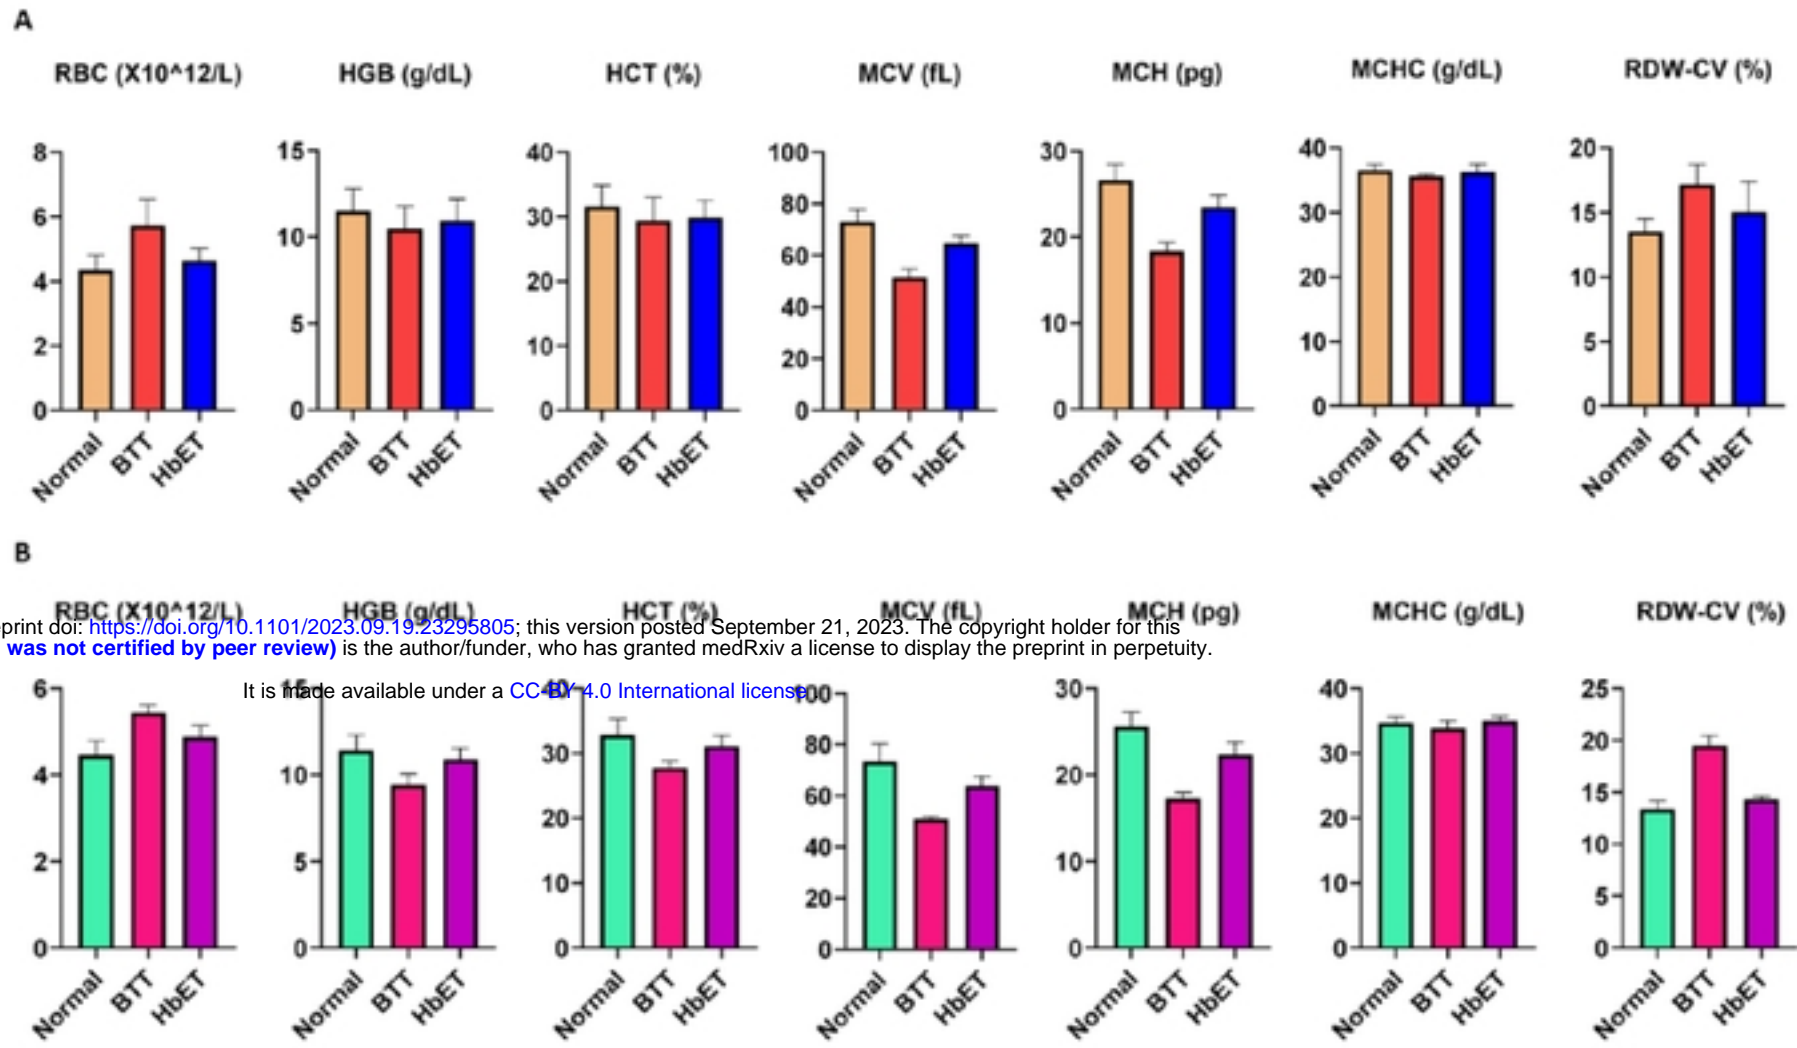

**Fig 3.** Distribution pattern of major hematological parameters.

Normal, Beta Thalassemia Trait (BTT), and Hemoglobin E Trait (HbET) groups in both (A) BD and (B) FDMN children.

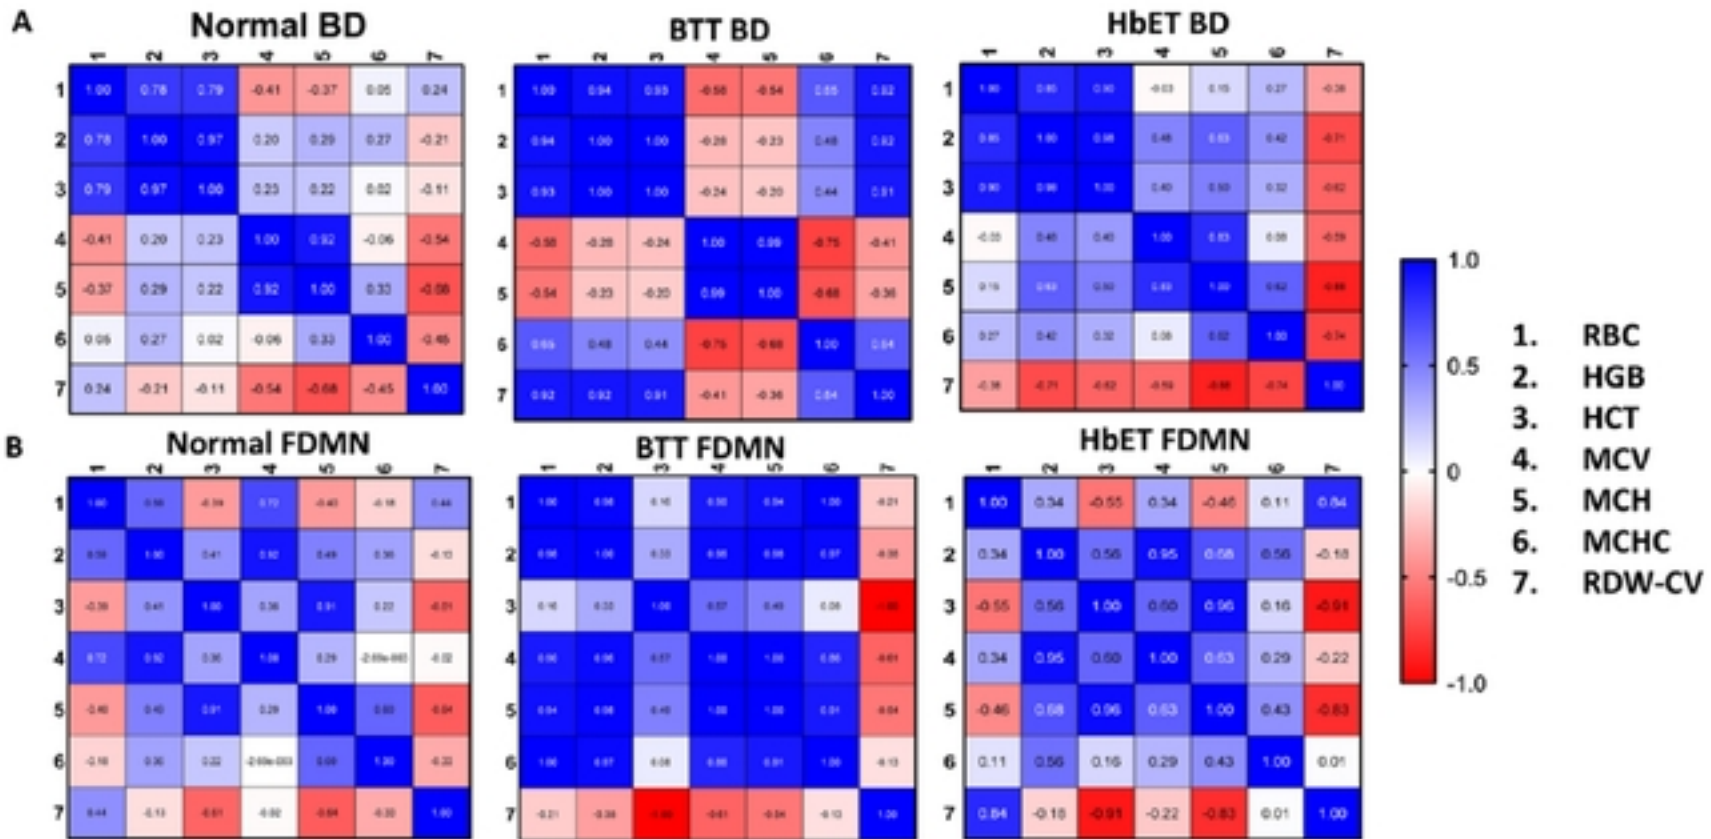

**Fig 4.** Correlation pattern in major hematological parameters in both BD and FDMN children in major groups.

The groups in (A) BD children and (B) FDMN children. BTT indicates Beta Thalassemia Trait and HbET indicates Hemoglobin E Trait. The major hematological parameters are numbered as 1 to 7 and the correlation is measured as -1.0 to 1.0. Color code indicates correlation pattern. Red color indicates negative correlation (-1.0 to 0) where -1.0 indicates least correlation and blue color indicates positive correlation (0 to 1.0) where 1.0 indicates highest correlation.

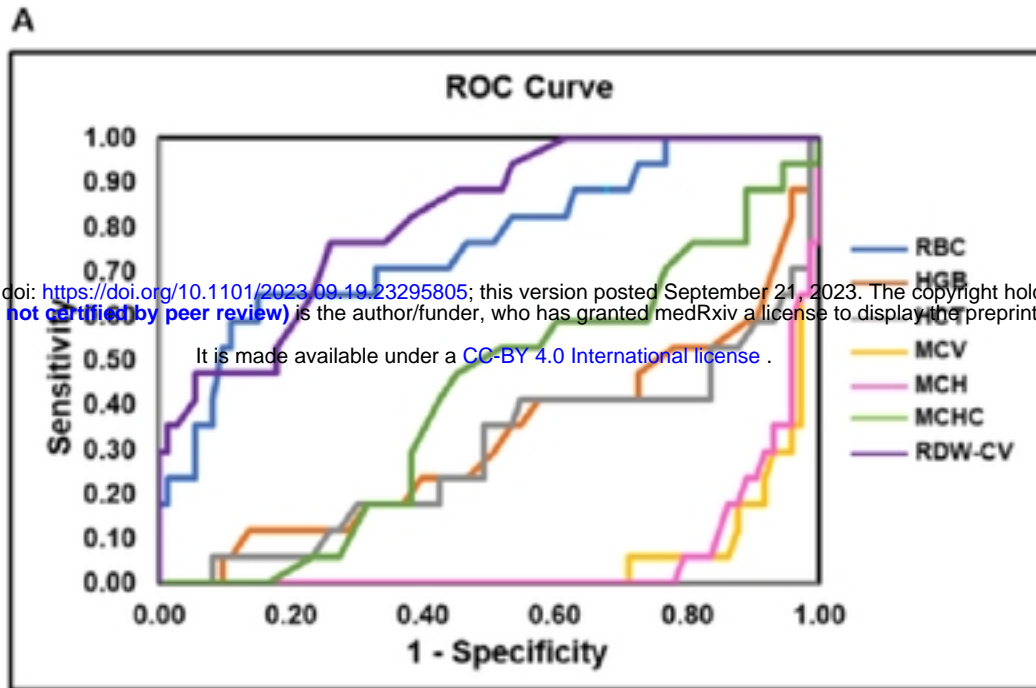

medRxiv preprint doi: <https://doi.org/10.1101/2023.09.19.23295805>; this version posted September 21, 2023. The copyright holder for this preprint (which was not certified by peer review) is the author/funder, who has granted medRxiv a license to display the preprint in perpetuity.

It is made available under a [CC-BY 4.0 International license](https://creativecommons.org/licenses/by/4.0/).

**Area Under the Curve**

| Test Result Variable(s)    | Area  | 95% Confidence Interval |             |
|----------------------------|-------|-------------------------|-------------|
|                            |       | Lower Bound             | Upper Bound |
| RBC (X10 <sup>12</sup> /L) | 0.761 | 0.801                   | 1.000       |
| HGB (g/dL)                 | 0.325 | 0.054                   | 0.386       |
| HCT (%)                    | 0.297 | 0.000                   | 0.037       |
| MCV (fL)                   | 0.053 | 0.039                   | 0.319       |
| MCH (pg)                   | 0.060 | 0.000                   | 0.094       |
| MCHC (g/dL)                | 0.418 | 0.294                   | 0.718       |
| RDW-CV (%)                 | 0.819 | 0.866                   | 0.983       |

B

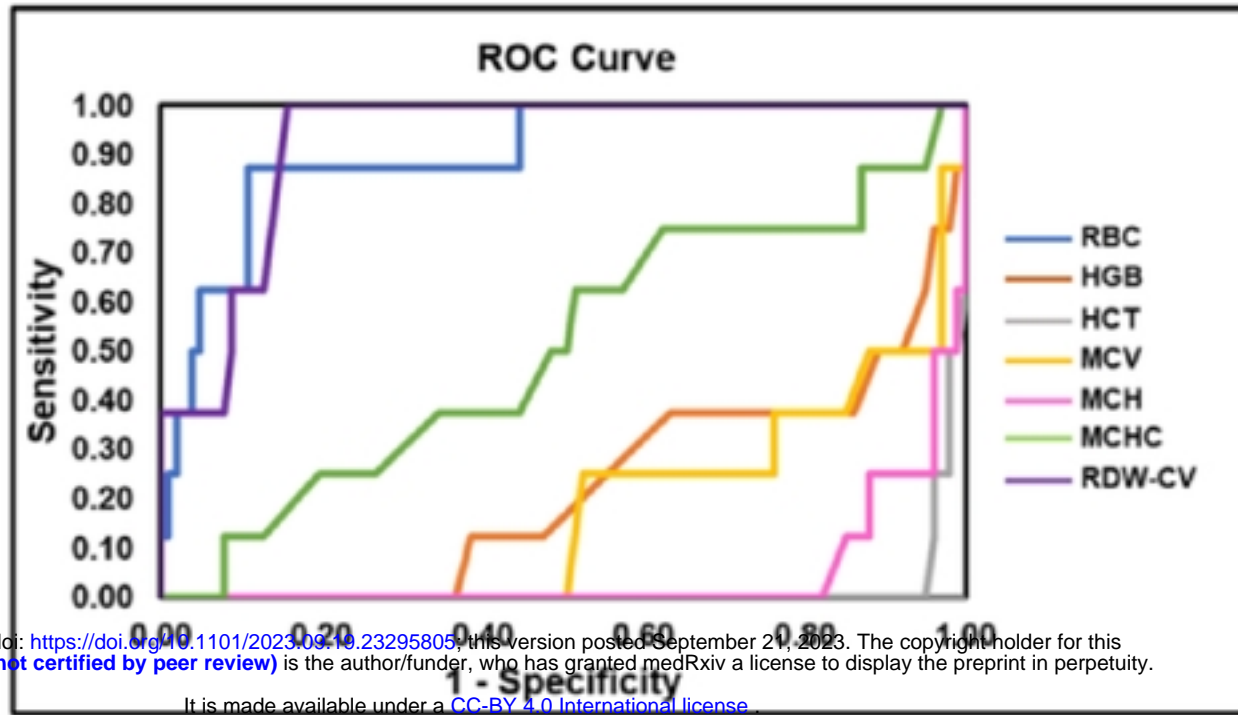

medRxiv preprint doi: <https://doi.org/10.1101/2023.09.10.23295805>; this version posted September 21, 2023. The copyright holder for this preprint (which was not certified by peer review) is the author/funder, who has granted medRxiv a license to display the preprint in perpetuity. It is made available under a [CC-BY 4.0 International license](https://creativecommons.org/licenses/by/4.0/).

### Area Under the Curve

| Test Result Variable(s)    | Area  | 95% Confidence Interval |             |
|----------------------------|-------|-------------------------|-------------|
|                            |       | Lower Bound             | Upper Bound |
| RBC (X10 <sup>12</sup> /L) | 0.902 | 0.801                   | 1.000       |
| HGB (g/dL)                 | 0.220 | 0.054                   | 0.386       |
| HCT (%)                    | 0.016 | 0.000                   | 0.037       |
| MCV (fL)                   | 0.179 | 0.039                   | 0.319       |
| MCH (pg)                   | 0.046 | 0.000                   | 0.094       |
| MCHC (g/dL)                | 0.506 | 0.294                   | 0.718       |
| RDW-CV (%)                 | 0.925 | 0.866                   | 0.983       |



C

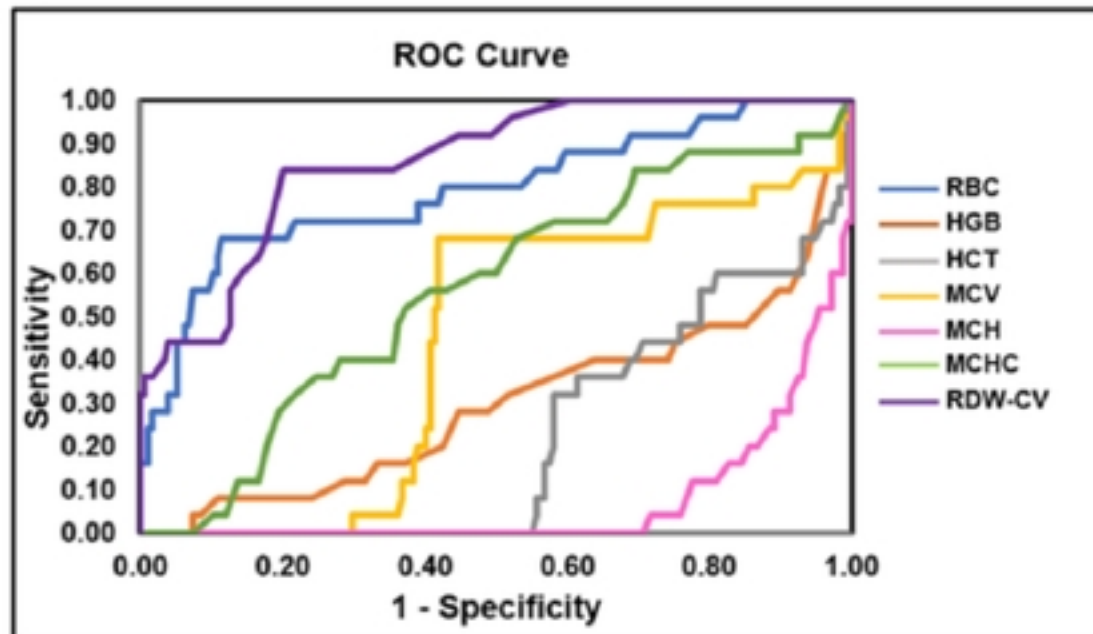

medRxiv preprint doi: <https://doi.org/10.1101/2023.09.19.23295805>; this version posted September 21, 2023. The copyright holder for this preprint (which was not certified by peer review) is the author/funder, who has granted medRxiv a license to display the preprint in perpetuity.

Area Under the Curve  
It is made available under a [CC-BY 4.0 International license](https://creativecommons.org/licenses/by/4.0/).

| Test Result Variable(s)    | Area  | 95% Confidence Interval |             |
|----------------------------|-------|-------------------------|-------------|
|                            |       | Lower Bound             | Upper Bound |
| RBC (X10 <sup>12</sup> /L) | 0.791 | 0.682                   | 0.899       |
| HGB (g/dL)                 | 0.299 | 0.178                   | 0.420       |
| HCT (%)                    | 0.222 | 0.141                   | 0.302       |
| MCV (fL)                   | 0.443 | 0.334                   | 0.552       |
| MCH (pg)                   | 0.072 | 0.032                   | 0.113       |
| MCHC (g/dL)                | 0.561 | 0.444                   | 0.677       |
| RDW-CV (%)                 | 0.858 | 0.788                   | 0.929       |

**Fig 5.** ROC curve and area under curve display classifier of blood parameter model. (A) BD (B) FDMN (C) both BD and FDMN.
